# Supplementary material
Source: PubMed Central journal article supplement (PMC3528524)
Supplement: 1213027109_pnas.201213027SI.pdf [file 1213027109_pnas.201213027SI.pdf]

# Supporting Information

Colson et al. 10.1073/pnas.1213027109

## SI Materials and Methods

**Preparation of MyBP-C.** Sf9 insect cells were infected with high-titer recombinant baculoviruses encoding FLAG-tagged full-length or truncated mouse MyBP-C (1), incubated 72 h postinfection. Full-length fast-skeletal (fsMyBP-C), slow-skeletal (ssMyBP-C) and cardiac (cMyBP-C), and truncated cardiac C0–C1 (i.e., C0–pa–C1, where pa is the linker rich in proline and alanine content), C0–C4 (i.e., C0–pa–C1–m–C2–C3–C4, where m is the phosphorylation motif), C5–C10 (i.e., lacking C0–C4), and  $\Delta$ C0–C1 (i.e., m–C2–C10, thus lacking C0–C1), as depicted in Fig. 3A. Expressed protein was purified by anti-FLAG M2 affinity chromatography as previously described for the purification of full-length FLAG-tagged mouse utrophin except that Triton X-100 was omitted (2–5). The concentration of purified proteins was measured with the Bradford protein assay using BSA as a standard.

**Preparation and Labeling of Actin.** Actin was prepared from rabbit skeletal muscle (4, 6) and suspended in 100 mM NaCl, 2 mM MgCl<sub>2</sub>, 0.2 mM ATP, 1 mM DTT, and 10 mM Tris, pH 8.0. For phosphorescence experiments, actin was labeled at C374 with erythrosin-5'-iodoacetamide (ErIA; AnaSpec) (4). Labeled F-actin (ErIA-actin) was stabilized against depolymerization and denaturation by adding one molar equivalent of phalloidin. The extent of labeling, determined by measuring dye absorbance and protein concentration, was  $0.87 \pm 0.11$  mol dye/mol actin. The concentration of labeled actin was measured with the Bradford protein assay using unmodified actin as a standard, as attached dyes had a negligible effect on this assay (5).

**In Vitro Phosphorylation of MyBP-C.** Purified MyBP-C was phosphorylated with the catalytic subunit of PKA (Sigma), using 0.01 units of PKA per  $\mu$ g of MyBP-C for 1 h at 25 °C (1). Phosphorylation status of MyBP-C was assessed by Pro-Q Diamond

phosphoprotein staining followed by Sypro-Ruby protein staining (Invitrogen). Untreated MyBP-C is not fully unphosphorylated. For example, cMyBP-C is expressed with mainly one site phosphorylated (7) and mainly three sites phosphorylated following treatment with PKA (1).

**Actin Binding Analysis.** Binding of proteins to actin filaments was measured using high-speed cosedimentation (8). Varying concentrations of MyBP-C were added to 5  $\mu$ M actin, incubated for 30 min at 20 °C, and then centrifuged at  $100,000 \times g$  for 20 min. The resulting pellets and supernatants were separated by SDS/PAGE and stained with Coomassie blue. The fractions of free and bound protein were quantified by densitometry.  $K_d$  and  $B_{max}$  of binding were obtained by fitting data by the hyperbolic binding function:

$$y = B_{max} * [P] / (K_d + [P]), \quad [S1]$$

where  $y$  = bound MyBP-C (mol/mol actin) and  $[P]$  = free MyBP-C ( $\mu$ M). Attached dyes had a negligible effect on this assay, so TPA results were compared with and interpreted in light of the extensive studies of MyBP-C actin-binding properties by Rybakova et al. (1), using the same purified proteins and experimental conditions.

**Electron Microscopy.** Samples of phosphorescent actin, prepared for spectroscopic experiments, were diluted to 0.02 mg/mL in MyBP-buffer; applied to glow-discharged, collodion-, and carbon-film-coated copper grids; stained by 1% uranyl acetate; and observed with a JEOL 100 CX electron microscope at an accelerating voltage of 80 kV. Photographs were taken at 5,000 $\times$  magnification, and digital copies of negatives were saved for viewing (6).

1. Rybakova IN, Greaser ML, Moss RL (2011) Myosin binding protein C interaction with actin: Characterization and mapping of the binding site. *J Biol Chem* 286(3): 2008–2016.
2. Rybakova IN, Patel JR, Davies KE, Yurchenco PD, Ervasti JM (2002) Utrophin binds laterally along actin filaments and can couple costameric actin with sarcolemma when overexpressed in dystrophin-deficient muscle. *Mol Biol Cell* 13(5):1512–1521.
3. Rybakova IN, Humston JL, Sonnemann KJ, Ervasti JM (2006) Dystrophin and utrophin bind actin through distinct modes of contact. *J Biol Chem* 281(15):9996–10001.
4. Prochniewicz E, Walseth TF, Thomas DD (2004) Structural dynamics of actin during active interaction with myosin: Different effects of weakly and strongly bound myosin heads. *Biochemistry* 43(33):10642–10652.
5. Prochniewicz E, Henderson D, Ervasti JM, Thomas DD (2009) Dystrophin and utrophin have distinct effects on the structural dynamics of actin. *Proc Natl Acad Sci USA* 106 (19):7822–7827.
6. Prochniewicz E, Zhang Q, Howard EC, Thomas DD (1996) Microsecond rotational dynamics of actin: Spectroscopic detection and theoretical simulation. *J Mol Biol* 255 (3):446–457.
7. Ge Y, Rybakova IN, Xu Q, Moss RL (2009) Top-down high-resolution mass spectrometry of cardiac myosin binding protein C revealed that truncation alters protein phosphorylation state. *Proc Natl Acad Sci USA* 106(31):12658–12663.
8. Rybakova IN, Amann KJ, Ervasti JM (1996) A new model for the interaction of dystrophin with F-actin. *J Cell Biol* 135(3):661–672.
